# Supplementary material for: Functional Environmental Screening of a Metagenomic Library Identifies stlA; A Unique Salt Tolerance Locus from the Human Gut Microbiome
Source: PubMed Central journal article supplement (PMC3861447; doi:10.1371/journal.pone.0082985), 2013-12-12
Supplement: pone.0082985.s001.pdf [file pone.0082985.s001.pdf]

**Figure S1. Growth in LB broth supplemented with various GI-associated stresses.**

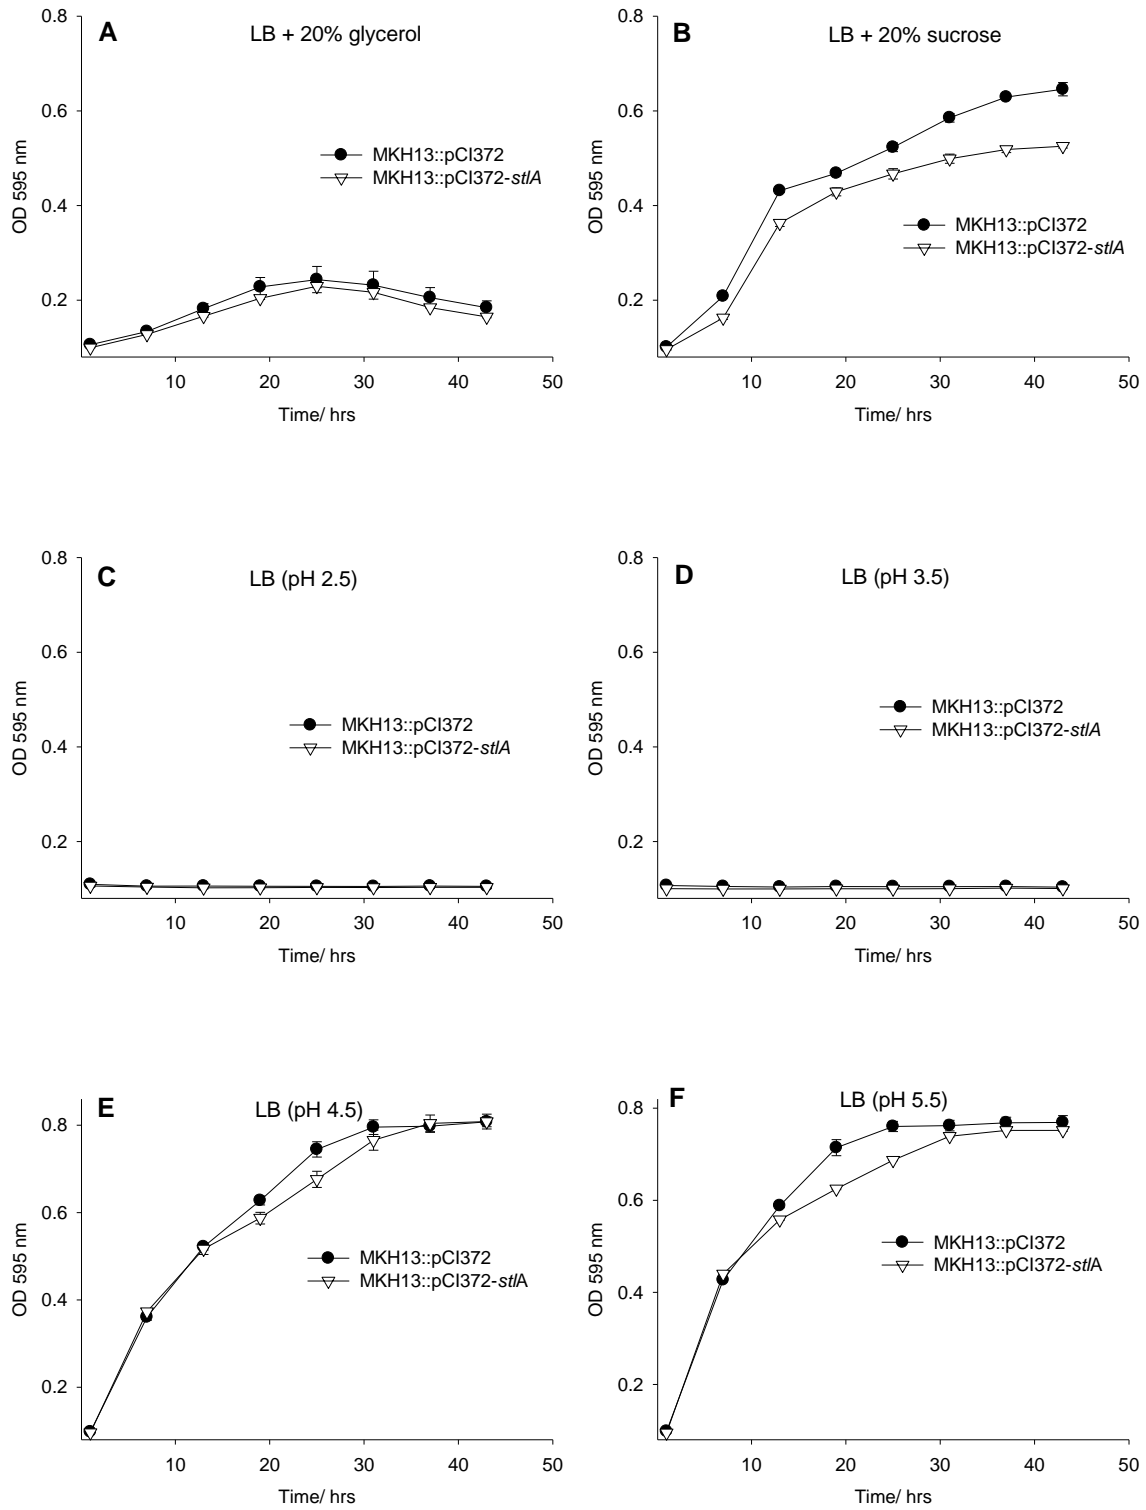

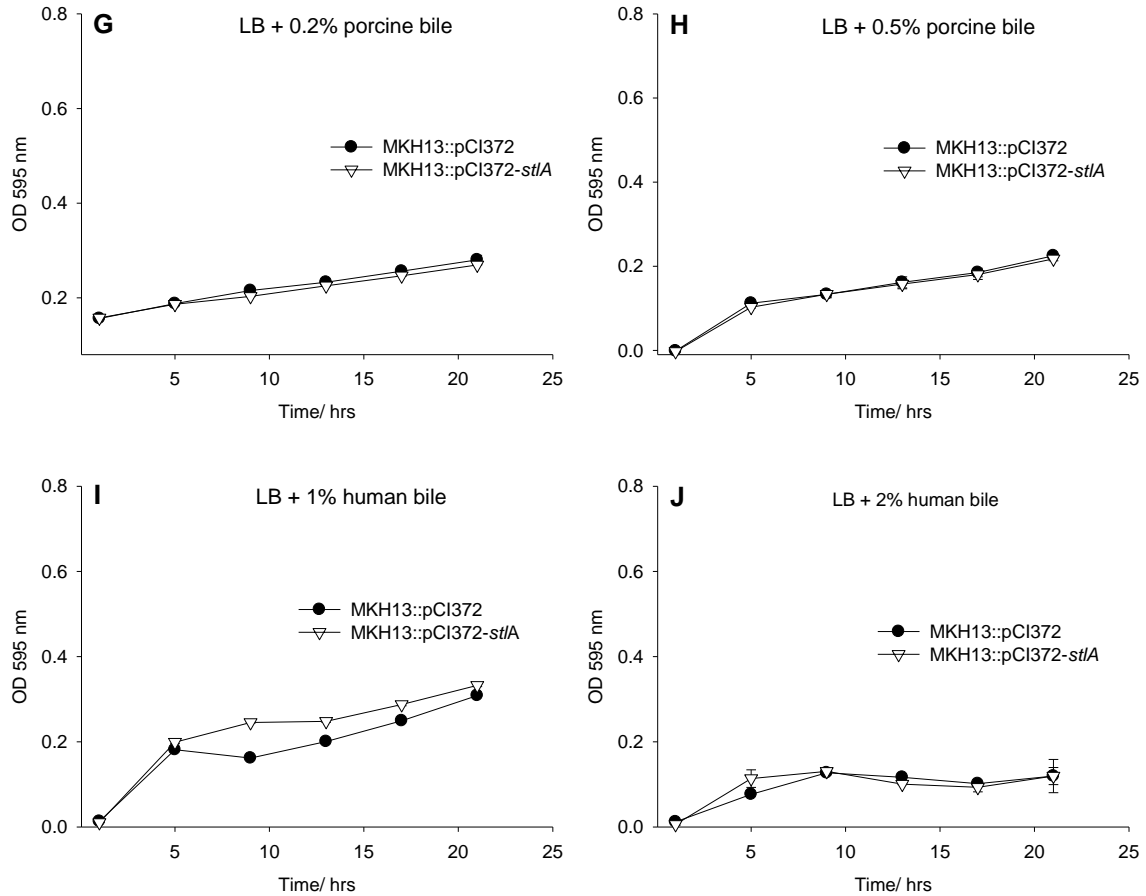

**Figure S1. Growth in LB broth supplemented with various GI-associated stresses.** Growth of *E. coli* MKH13::pCI372 and *E. coli* MKH13::pCI372-*stlA* in LB broth supplemented with numerous stresses associated with the GI (gastrointestinal) tract, such as non-ionic osmotic stress (sucrose and glycerol), low pH and bile. A plasmid-encoded copy of the *stlA* gene did not confer increased tolerance to any of these stresses when expressed in *E. coli* MKH13. Results are presented as the average of triplicate experiments, with error bars being representative of the standard error of the mean (SEM).
