# Supplementary material for: Functional Environmental Screening of a Metagenomic Library Identifies stlA; A Unique Salt Tolerance Locus from the Human Gut Microbiome
Source: PubMed Central journal article supplement (PMC3861447; doi:10.1371/journal.pone.0082985), 2013-12-12
Supplement: pone.0082985.s003.pdf [file pone.0082985.s003.pdf]

**Figure S3. Taxonomic assignment of scaffold sequences from Human Microbiome Project on which an *stIA* homologue was found.**

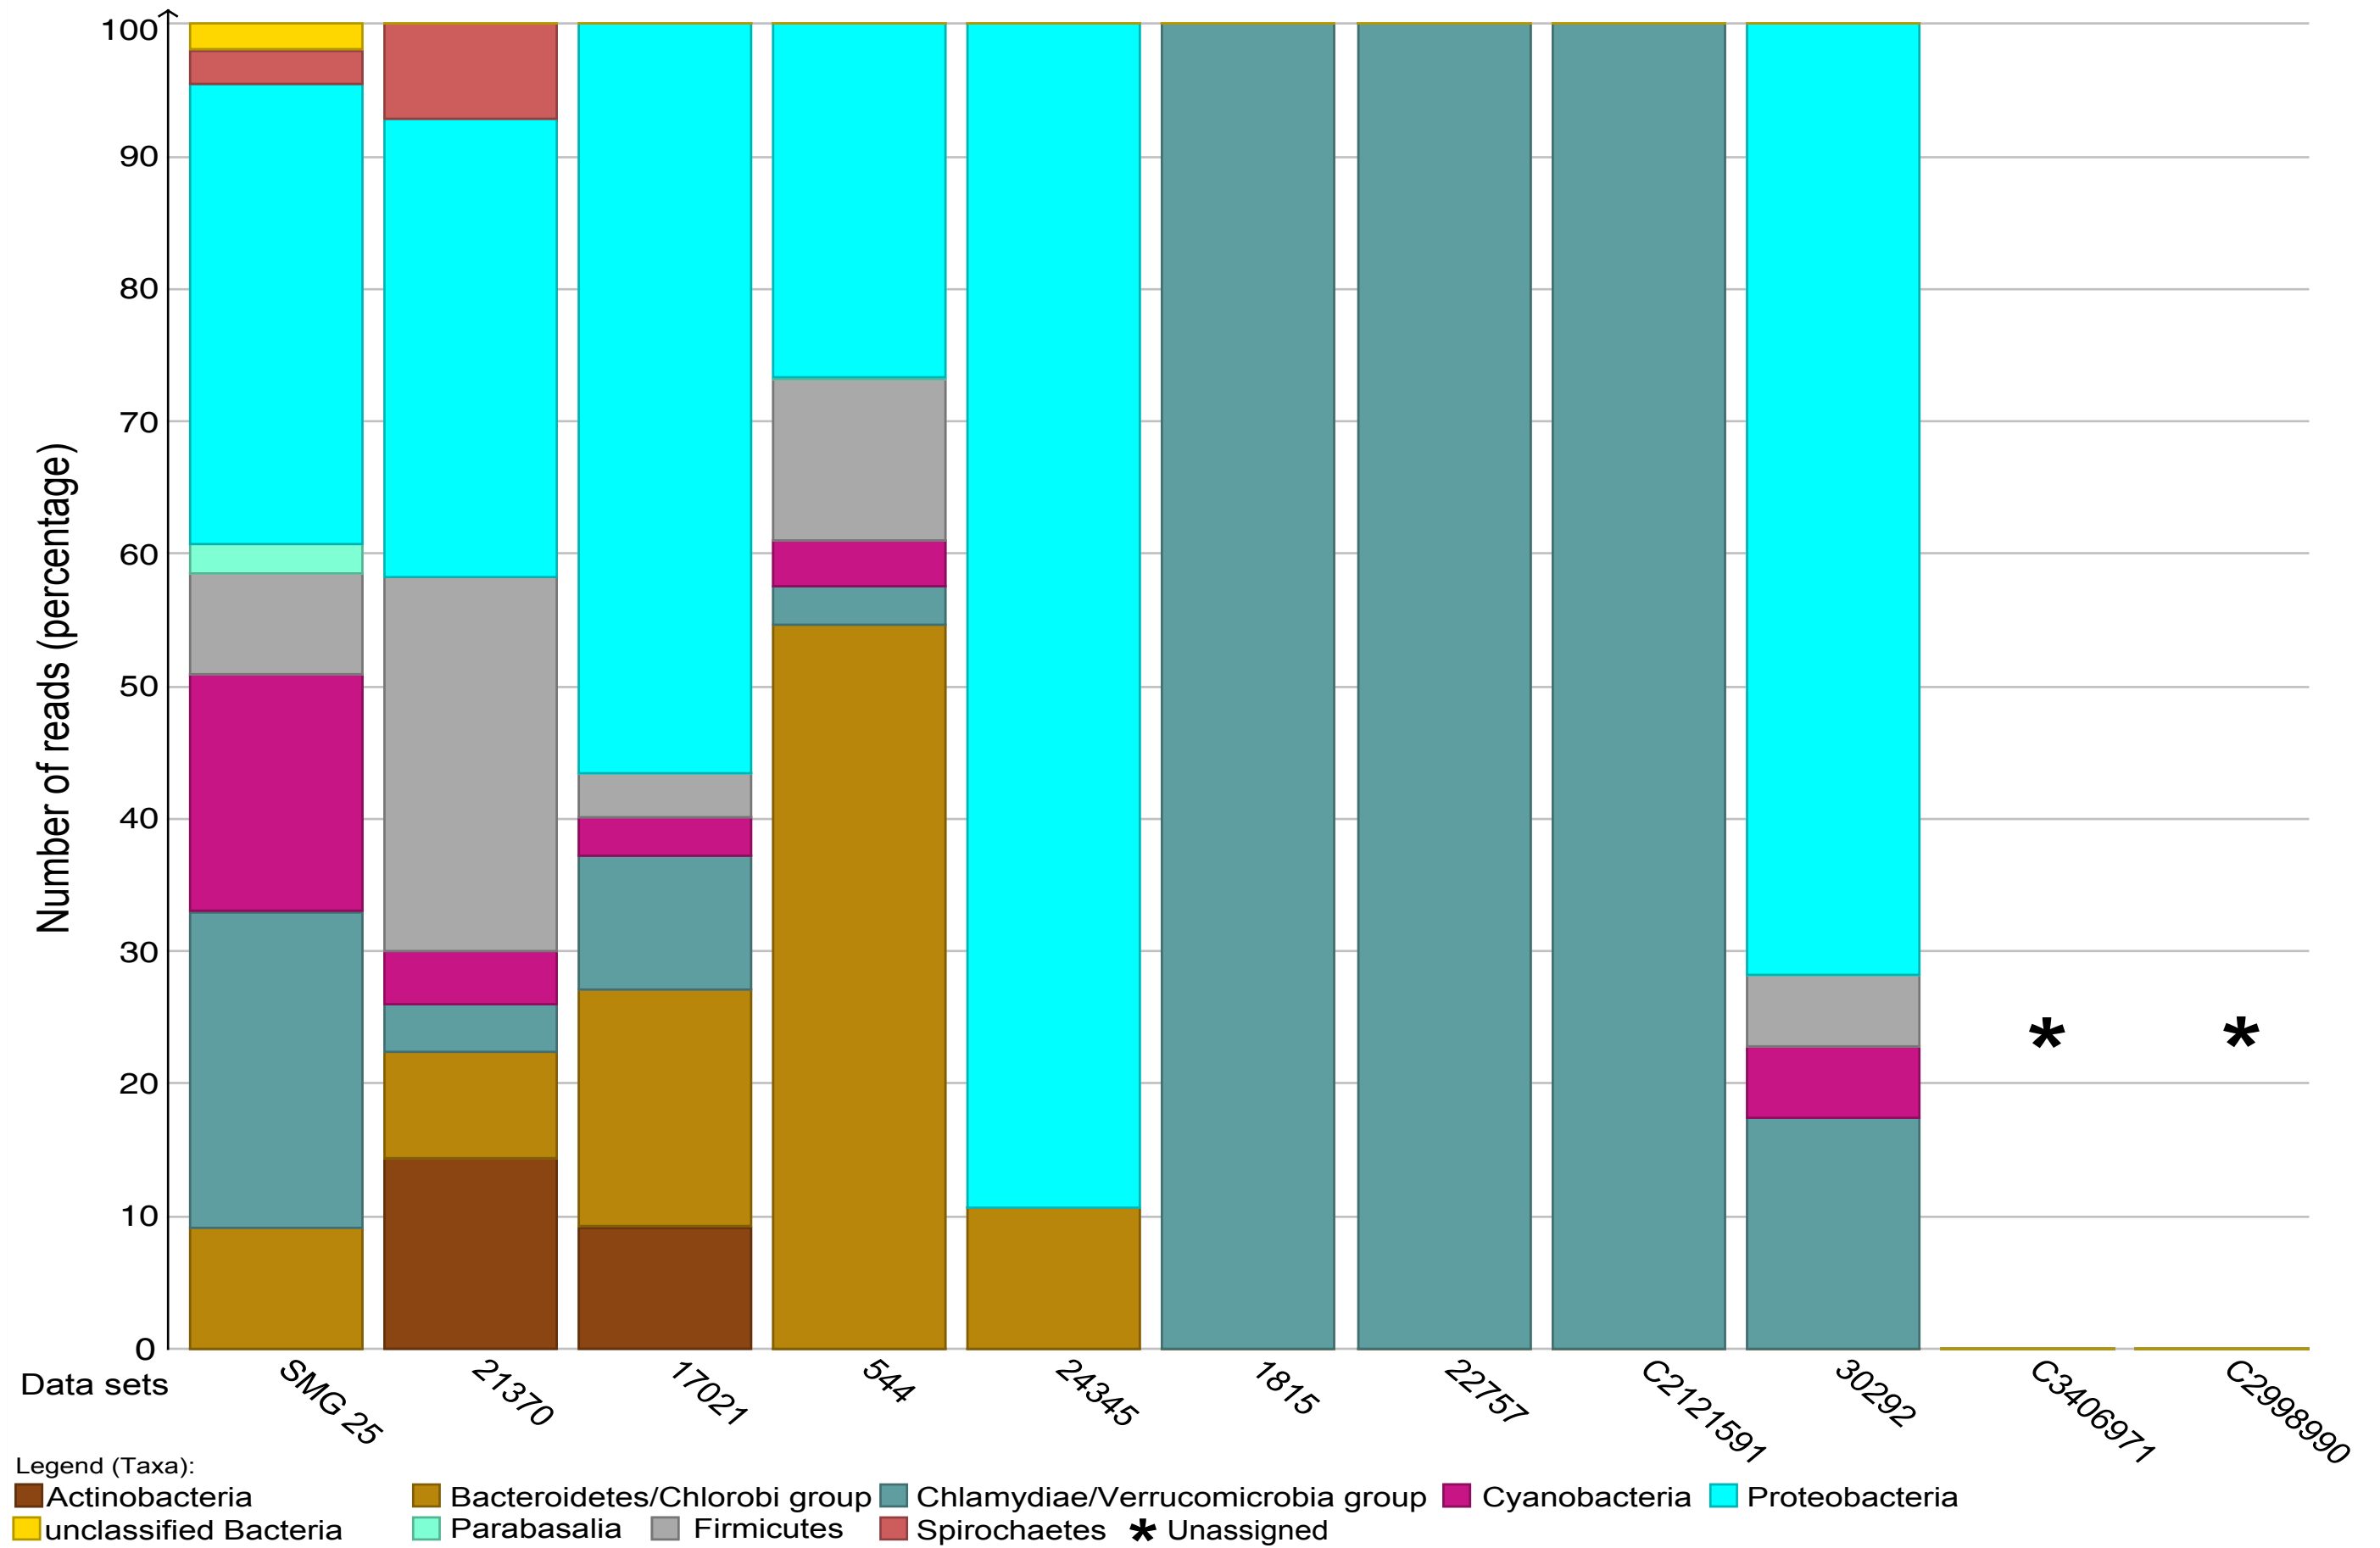

**Figure S3. Taxonomic assignment of scaffold sequences from Human Microbiome Project on which an *stIA* homologue was found.** Scaffold sequences were analysed using BLASTX. The BLASTX results were then downloaded and imported in MEGAN 4 software program which performed taxonomic assignment of each scaffold based on BLAST reads. Two of the shorter scaffolds indicated with an asterisk (\*) could not be assigned any taxonomic classification.
