# Supplementary material for: Functional Environmental Screening of a Metagenomic Library Identifies stlA; A Unique Salt Tolerance Locus from the Human Gut Microbiome
Source: PubMed Central journal article supplement (PMC3861447; doi:10.1371/journal.pone.0082985), 2013-12-12
Supplement: pone.0082985.s004.pdf [file pone.0082985.s004.pdf]

**Figure S4. Comparisons of gene arrangement on SMG 25 fosmid insert and scaffolds with *stIA* homologues from Human Microbiome Project.**

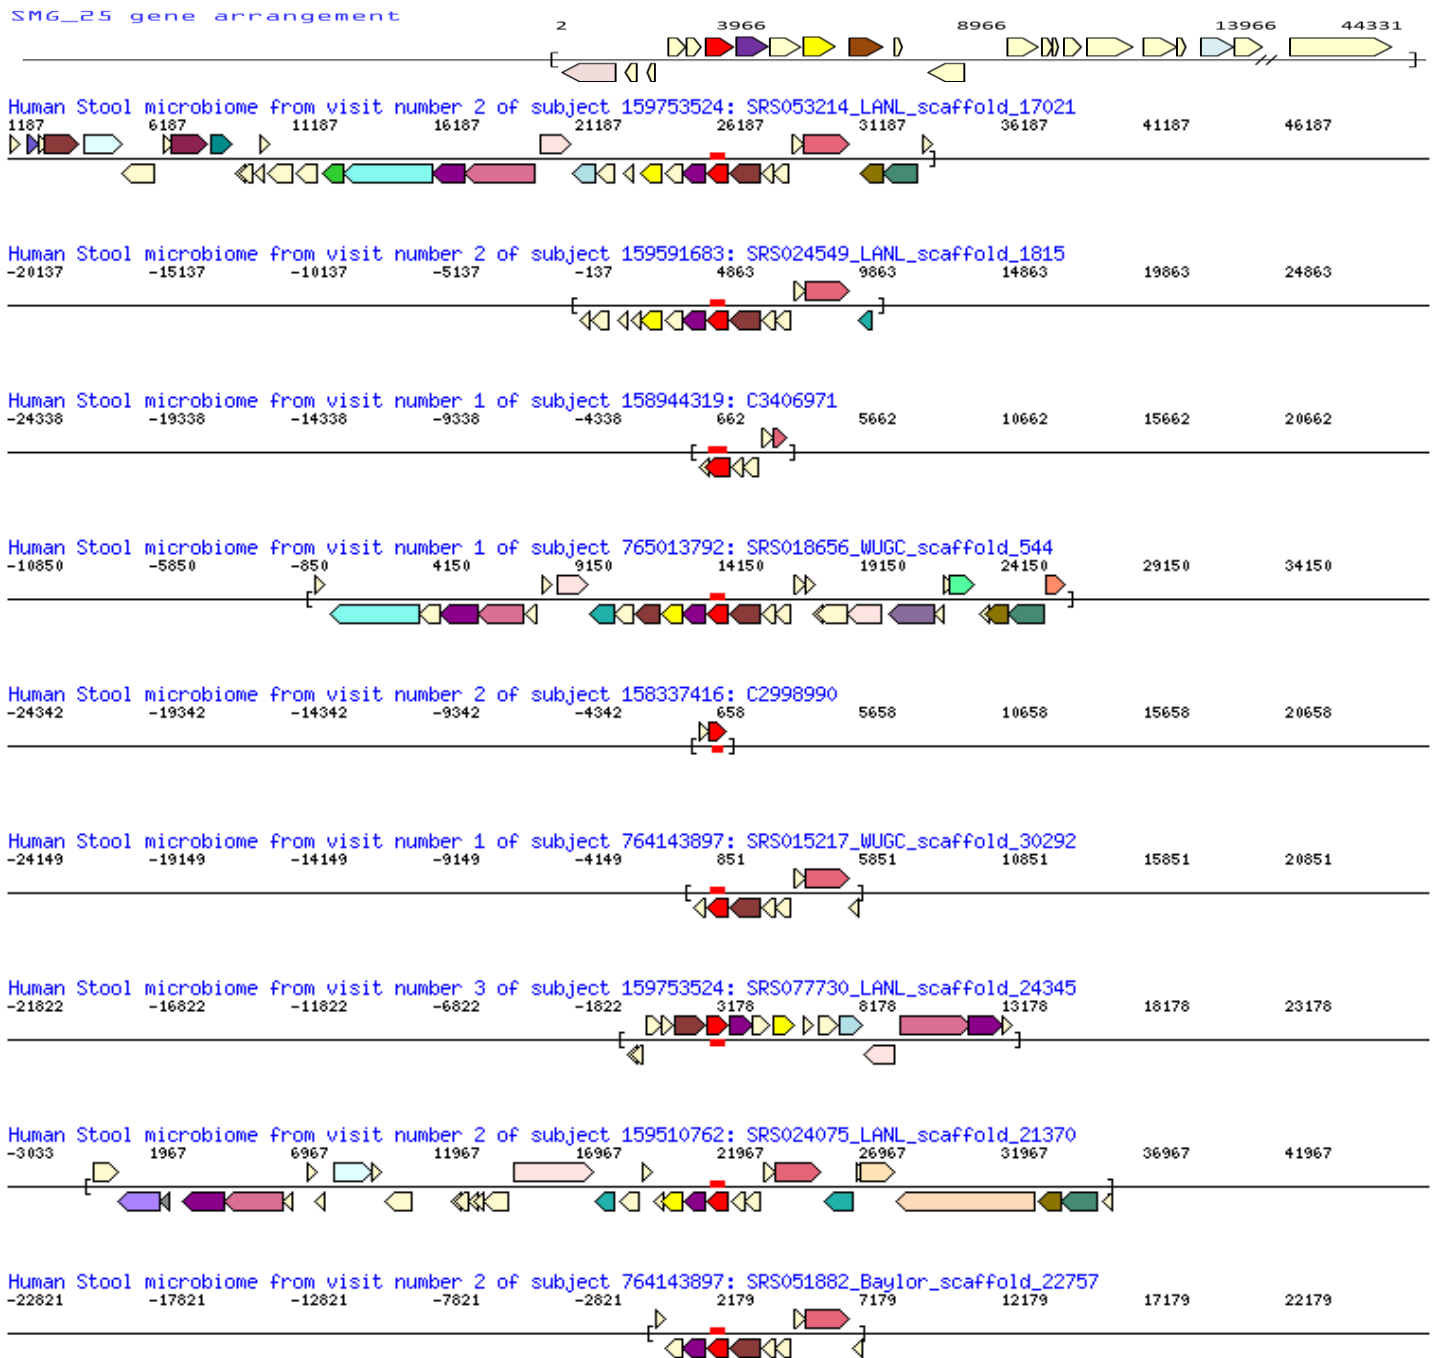

**Figure S4.** The gene neighbourhood region of the *stIA* gene from SMG 25 is compared with gene neighbourhoods from scaffolds with an *stIA* homologue. Homologues of *stIA* were identified through similarity searches (BLASTP;  $1e^{-50}$  cut-off) to the Human Microbiome Project (HMP) datasets. Ten *stIA* homologues were identified and only from the stool microbiome. A legend describing putative

gene functions is presented below datasets. Ten *sttA* homologues were identified and only from the stool microbiome. A legend describing putative gene functions is presented below.

**Legend:** Red = Hypothetical/membrane protein (*sttA* and homologues); Cream = Hypothetical protein; Dark purple = NADH:ubiquinone oxidoreductase (COG0838); Medium brown = Fucose permease (COG0838); Light blue = Site-specific recombinase, XerD (COG4974); Dark brown = Uncharacterized protein related to capsule biosynthesis enzymes (COG3550); Dark blue/grey = Predicted restriction endonuclease (COG3183); Green = Predicted metal-dependent hydrolase (COG1451); Light-medium blue = Type I site-specific restriction-modification system (COG0610); Light purple = Restriction endonuclease (COG0732); Light maroon = Type I restriction-modification system methyltransferase subunit (COG0286); Light pink = Restriction endonuclease (COG1715); Medium blue = ATP-dependent nuclease (COG3857); Yellow = Predicted membrane protein (TM2 domain) (COG2314); Purple = DnaJ-class molecular chaperone with C-terminal Zn finger domain (COG0484); Brown = Ankyrin repeat protein (COG0666); Dark pink = Serine/threonine protein kinase (COG0515); Olive = Uncharacterized protein with von Willebrand factor (vWF) domain (COG4245); Dark blue = Uncharacterized protein with protein kinase and helix-hairpin-helix DNA-binding domains (COG4248); Light mint green = Virulence protein (COG3943); Mint green = RecB family exonuclease (COG2887); Pink = Predicted oxidoreductase (COG0667); Purple/grey = Hydrolases of the alpha/beta superfamily (COG1073); Light green = Transcriptional regulator, AraC-type DNA-binding domain-containing proteins (COG2207); Orange = Predicted ATPase (AAA+ superfamily) (COG1373); Light grey = Site-specific recombinase, DNA invertase Pin homologs (COG1961); Dark cream = Filamentation induced by cAMP protein (COG3177); Light orange = Predicted helicase (COG4889).
