# Supplementary material for: Functional Environmental Screening of a Metagenomic Library Identifies stlA; A Unique Salt Tolerance Locus from the Human Gut Microbiome
Source: PubMed Central journal article supplement (PMC3861447; doi:10.1371/journal.pone.0082985), 2013-12-12
Supplement: pone.0082985.s007.pdf [file pone.0082985.s007.pdf]

**Table S1. Strains, plasmids and transposon used in this study.**

| <b>Strain, plasmid or transposon</b>                  | <b>Genotype or characteristic(s)</b>                                                                                                                                                                                               | <b>Source or reference</b>                     |
|-------------------------------------------------------|------------------------------------------------------------------------------------------------------------------------------------------------------------------------------------------------------------------------------------|------------------------------------------------|
| <b>Strains</b>                                        |                                                                                                                                                                                                                                    |                                                |
| <i>E. coli</i> EPI300                                 | F <sup>-</sup> <i>mcrAΔ(mrr-hsdRMS-mcrBC)</i><br>Φ80d <i>lacZΔM15 ΔlacX74 recA1 endA1</i><br><i>araD139 Δ(ara, leu)7697 galU galK λ<sup>-</sup> rpsL</i><br><i>nupG trfA dhfr</i> ; high-transformation<br>efficiency of large DNA | Epicentre Biotechnologies,<br>Madison, WI, USA |
| <i>E. coli</i> MKH13                                  | MC4100Δ( <i>putPA</i> )101D( <i>proP</i> )2D( <i>proU</i> )                                                                                                                                                                        | [22]                                           |
| <i>E. coli</i> MKH13::pCI372                          | MKH13 containing pCI372 shuttle vector                                                                                                                                                                                             | This study                                     |
| <i>E. coli</i> MKH13::pCI372- <i>stIA</i>             | MKH13 containing pCI372 with <i>stIA</i> gene<br>from human gut metagenomic library clone<br>SMG 25                                                                                                                                | This study                                     |
| <i>L. lactis</i> subspecies<br><i>cremoris</i> MG1363 | Plasmid-free <i>Lactococcus</i> strain                                                                                                                                                                                             | [23]                                           |
| <i>L. lactis</i> MG1363::pCI372                       | MG1363 containing pCI372 shuttle vector                                                                                                                                                                                            | This study                                     |
| <i>L. lactis</i><br>MG1363::pCI372- <i>stIA</i>       | MG1363 containing pCI372 with <i>stIA</i> gene<br>from human gut metagenomic library clone<br>SMG 25                                                                                                                               | This study                                     |
| <b>Plasmids</b>                                       |                                                                                                                                                                                                                                    |                                                |
| pCI372                                                | Shuttle vector between <i>E. coli</i> and <i>L. lactis</i> ,<br>Cm <sup>R</sup>                                                                                                                                                    | [24]                                           |
| pCC1FOS                                               | Fosmid cloning vector, Cm <sup>R</sup>                                                                                                                                                                                             | Epicentre Biotechnologies,<br>Madison, WI, USA |
| <b>Transposon</b>                                     |                                                                                                                                                                                                                                    |                                                |
| EZ-Tn5 < <i>oriV</i> / KAN-2>                         | Hyperactive Tn5 transposon, Kan <sup>R</sup> ,<br>inducible high copy origin of replication –<br><i>oriV</i>                                                                                                                       | Epicentre Biotechnologies,<br>Madison, WI, USA |

Cm<sup>R</sup> = chloramphenicol resistance; Kan<sup>R</sup> = kanamycin resistance.
