# Supplementary material for: Functional Environmental Screening of a Metagenomic Library Identifies stlA; A Unique Salt Tolerance Locus from the Human Gut Microbiome
Source: PubMed Central journal article supplement (PMC3861447; doi:10.1371/journal.pone.0082985), 2013-12-12
Supplement: pone.0082985.s008.pdf [file pone.0082985.s008.pdf]

**Table S2. Primers used in this study.**

| <b>Primer</b>       | <b>Sequence (5' – 3')<sup>a</sup></b>   |
|---------------------|-----------------------------------------|
| pCI372 FP           | CGGGAAGCTAGAGTAAGTAG                    |
| pCI372 RP           | CCTCTCGGTTATGAGTTAG                     |
| <i>stI</i> A FP     | AAA <u>ACTGCAGTTCTGGCAGCAGT</u> GATTTTG |
| <i>stI</i> A RP     | G <u>CTCTAGACGGTCGAGCAAGGTA</u> ATAGG   |
| <i>stI</i> A-J FP   | TGCTCTTCCGAAGCAGTCAG                    |
| <i>stI</i> A-J RP   | AGCATATCGAAGACGGCCAG                    |
| <i>stI</i> A-OUT FP | CTGCTCTGTTGATGGGGTTT                    |
| <i>stI</i> A-OUT RP | CGGGCAACTACAAGGATGAT                    |
| <i>stI</i> A-IN FP  | TATGGGAGGGGCTACTACGG                    |
| <i>stI</i> A-IN RP  | ACCCAGTTGCCAAGCATATC                    |
| EZ-Tn FP-1          | GCCAACGACTACGCACTAGCCAAC                |
| EZ-Tn RP-1          | GAGCCAATATGCGAGAACACCCGAGAA             |

<sup>a</sup>Restriction enzyme recognition sequences are underlined; FP= forward primer; RP= reverse primer.
