# Supplementary material for: Functional Environmental Screening of a Metagenomic Library Identifies stlA; A Unique Salt Tolerance Locus from the Human Gut Microbiome
Source: PLOS journal article supplement (doi:10.1371/journal.pone.0082985), 2013-12-12
Supplement: S8 (10.1371/journal.pone.0082985.s008) [file journal.pone.0082985.s008.PDF]

**UCC Library and UCC researchers have made this item openly available. Please [let us know](#) how this has helped you. Thanks!**

|                                    |                                                                                                                                                                                                                                                                                                                                                                            |
|------------------------------------|----------------------------------------------------------------------------------------------------------------------------------------------------------------------------------------------------------------------------------------------------------------------------------------------------------------------------------------------------------------------------|
| <b>Title</b>                       | Functional environmental screening of a metagenomic library identifies stlA; a unique salt tolerance locus from the human gut microbiome                                                                                                                                                                                                                                   |
| <b>Author(s)</b>                   | Culligan, Eamonn P.; Sleator, Roy D.; Marchesi, Julian R.; Hill, Colin                                                                                                                                                                                                                                                                                                     |
| <b>Publication date</b>            | 2013                                                                                                                                                                                                                                                                                                                                                                       |
| <b>Original citation</b>           | Culligan EP, Sleator RD, Marchesi JR, Hill C (2013) Functional Environmental Screening of a Metagenomic Library Identifies stlA; A Unique Salt Tolerance Locus from the Human Gut Microbiome . PLoS ONE 8(12): e82985. doi:10.1371/journal.pone.0082985                                                                                                                    |
| <b>Type of publication</b>         | Article (peer-reviewed)                                                                                                                                                                                                                                                                                                                                                    |
| <b>Link to publisher's version</b> | <a href="http://dx.doi.org/10.1371/journal.pone.0082985">http://dx.doi.org/10.1371/journal.pone.0082985</a><br>Access to the full text of the published version may require a subscription.                                                                                                                                                                                |
| <b>Rights</b>                      | © 2015 Culligan et al. This is an open access article distributed under the terms of the Creative Commons Attribution License, which permits unrestricted use, distribution, and reproduction in any medium, provided the original author and source are credited<br><a href="http://creativecommons.org/licenses/by/4.0/">http://creativecommons.org/licenses/by/4.0/</a> |
| <b>Item downloaded from</b>        | <a href="http://hdl.handle.net/10468/2350">http://hdl.handle.net/10468/2350</a>                                                                                                                                                                                                                                                                                            |

Downloaded on 2019-11-12T21:23:38Z

**Table S2. Primers used in this study.**

| <b>Primer</b>       | <b>Sequence (5' – 3')<sup>a</sup></b>   |
|---------------------|-----------------------------------------|
| pCI372 FP           | CGGGAAGCTAGAGTAAGTAG                    |
| pCI372 RP           | CCTCTCGGTTATGAGTTAG                     |
| <i>stI</i> A FP     | AAA <u>ACTGCAGTTCTGGCAGCAGT</u> GATTTTG |
| <i>stI</i> A RP     | G <u>CTCTAGACGGTCGAGCAAGGTA</u> ATAGG   |
| <i>stI</i> A-J FP   | TGCTCTTCCGAAGCAGTCAG                    |
| <i>stI</i> A-J RP   | AGCATATCGAAGACGGCCAG                    |
| <i>stI</i> A-OUT FP | CTGCTCTGTTGATGGGGTTT                    |
| <i>stI</i> A-OUT RP | CGGGCAACTACAAGGATGAT                    |
| <i>stI</i> A-IN FP  | TATGGGAGGGGCTACTACGG                    |
| <i>stI</i> A-IN RP  | ACCCAGTTGCCAAGCATATC                    |
| EZ-Tn FP-1          | GCCAACGACTACGCACTAGCCAAC                |
| EZ-Tn RP-1          | GAGCCAATATGCGAGAACACCCGAGAA             |

<sup>a</sup>Restriction enzyme recognition sequences are underlined; FP= forward primer; RP= reverse primer.
